# Supplementary material
Source: Springer Nature journal article supplement (https://www.springermedizin.de/resource/supplementary/12950_2007_64_MOESM8_ESM.pdf/9557930)

# Figure 5 (Choice 1b)

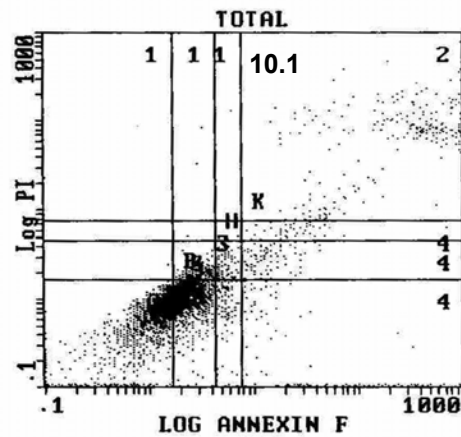

10  $\mu$ M FTI

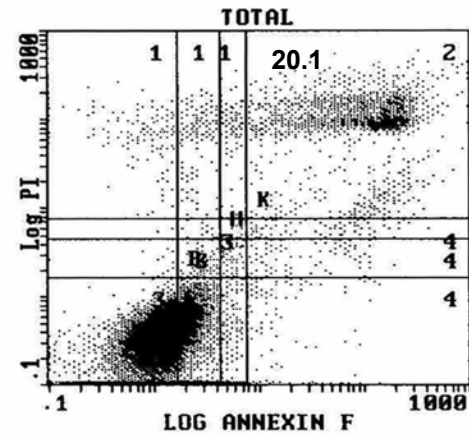

Control

Supplement: MOESM8 [file 9557930]
